# Supplementary material for: Exaggerated effects of particulate matter air pollution in genetic type II diabetes mellitus
Source: PubMed Central journal article supplement (PMC4049808; doi:10.1186/1743-8977-11-27), 2014-05-30

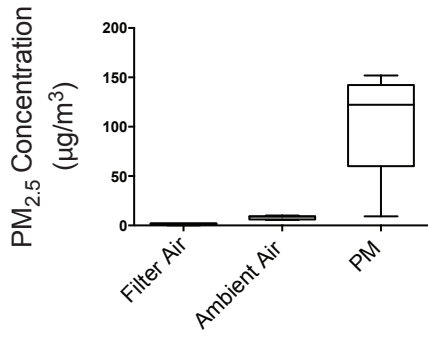

A

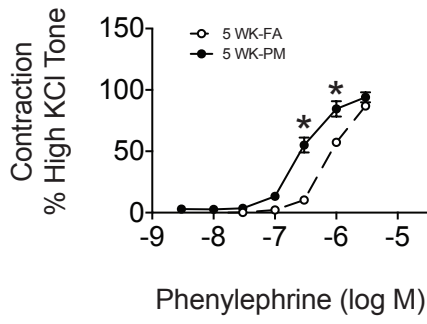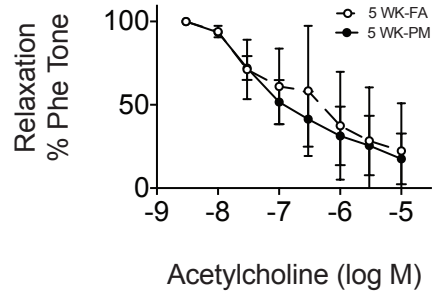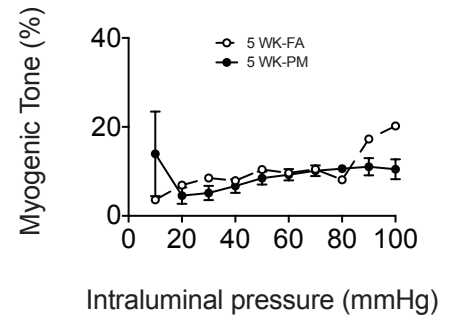

B

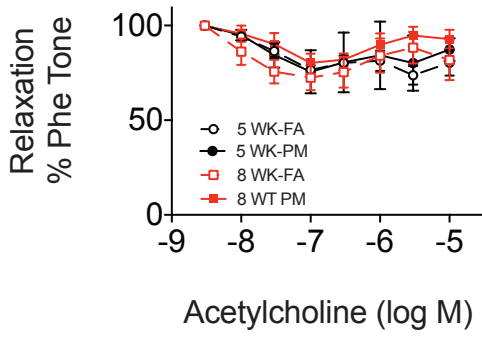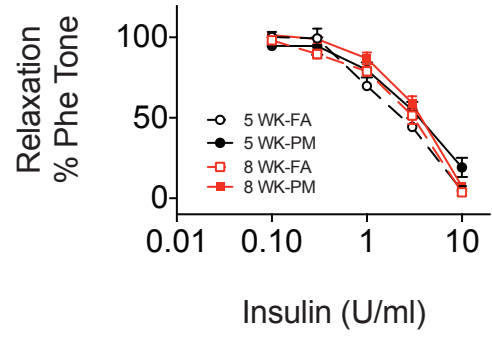

Supplement: 1743-8977-11-27-S1.pdf [file 1743-8977-11-27-S1.pdf]
